# Supplementary material for: Stakeholders’ Understanding of European Medicine Agency’s COVID-19 Vaccine Information Materials in EU and Regional Contexts
Source: MDPI journal article supplement (doi:10.3390/vaccines11101616), 2023-10-19

**Supplementary Figure 1.** Usefulness of having key facts in another shareable material besides EMA webpage

EU-level (n=30) and regional (n=30) participants' interest in having "COVID-19 vaccines: key facts" in a shareable document.

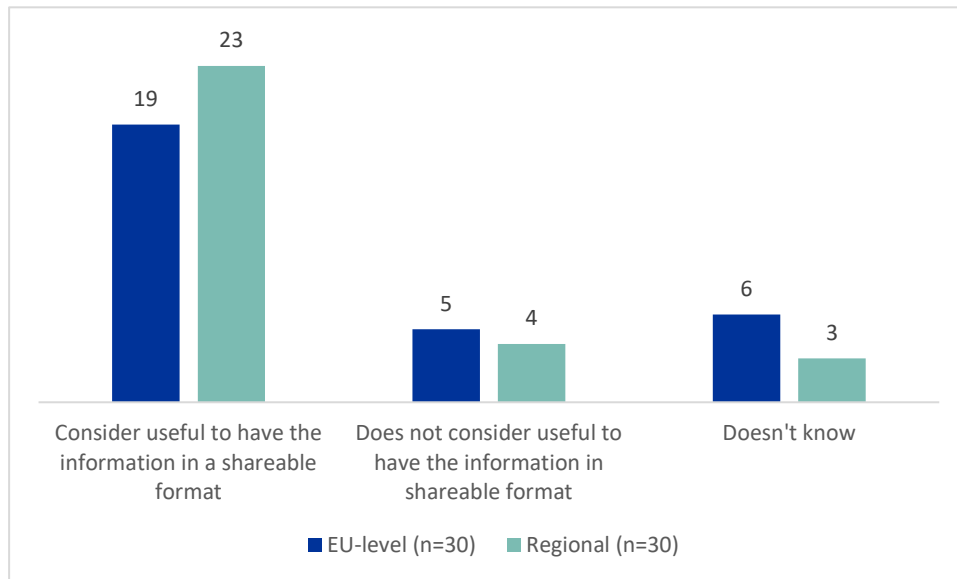

Supplement: s1 [file s1]
